# Supplementary material
Source: PubMed Central journal article supplement (PMC3594367)
Supplement: NIHMS430226-supplement-01.pdf [file NIHMS430226-supplement-01.pdf]

Fig. S1

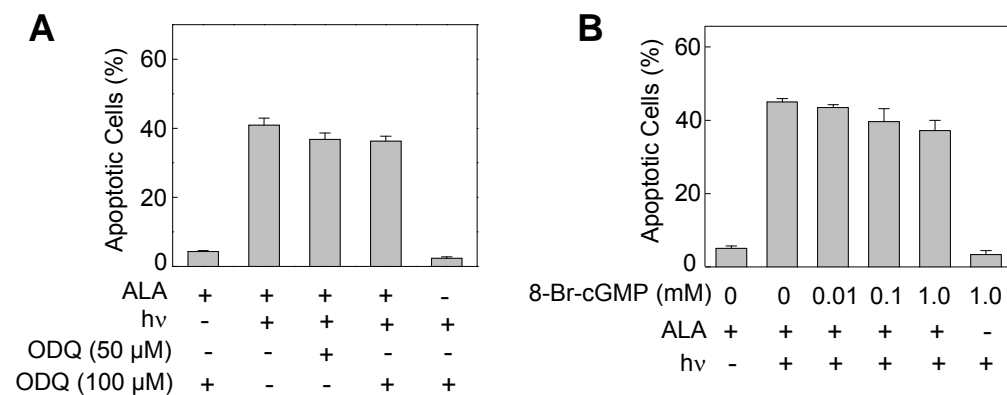

**Figure S1.** Effects of a soluble guanylyl cyclase inhibitor or cyclic GMP supplementation. (A) WT COH-BR1 cells were preincubated with ALA in the absence or presence of sGC inhibitor ODQ at 50  $\mu$ M or 100  $\mu$ M. The cells were then exposed to a 2 J/cm<sup>2</sup> light fluence followed by 20 h of dark incubation, after which apoptotic count was determined by Ho/PI staining. ODQ was maintained at the indicated concentrations during and after irradiation. (B) In a separate experiment, cells were preincubated with ALA in the absence or presence of 10  $\mu$ M, 100  $\mu$ M, or 1 mM 8-Br-cGMP and then irradiated (2 J/cm<sup>2</sup>). After 20 h of dark incubation, apoptosis was assessed as described in (A). Means  $\pm$  SD of data from 3 separate experiments are plotted.

Fig. S2

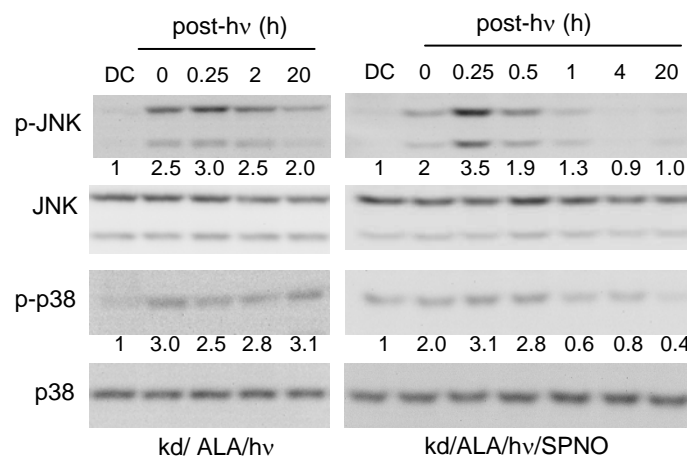

**Figure S2.** Effect of exogenous NO on extent of JNK and p38 activation in photostressed iNOS-kd cells. ALA-treated COH-BR1 iNOS-kd cells were irradiated (1 J/cm<sup>2</sup>) in the absence (A) or presence (B) of 0.1 mM SPNO and Western blot-analyzed for level of JNK and p38 phosphorylation at the indicated post-irradiation times. Number below each lane for p-JNK and p-p38 represents band intensity normalized to total JNK and p38, respectively, and relative to DC. Data are from one experiment representative of two for each situation.

Fig. S3

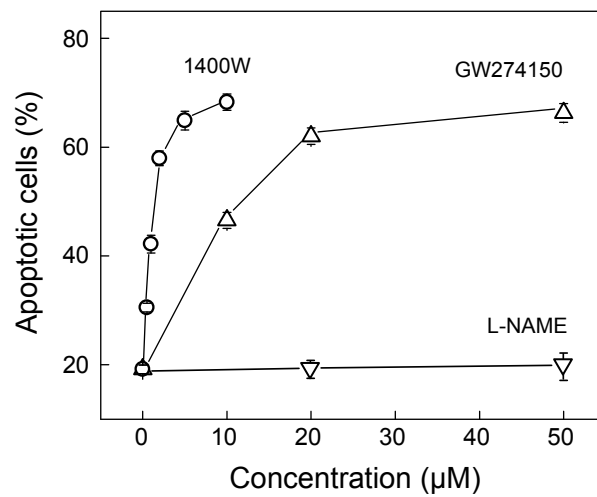

**Figure S3.** Effects of NOS inhibitor on ALA/light-induced apoptosis of MDA-MB-231 cells. Cells in DME medium were treated with 1 mM ALA for 45 min in the absence or presence of 10 µM 1400W (○), 50 µM GW274150 (△), or 1 mM L-NAME (▽), and then exposed to a 0.5 J/cm<sup>2</sup> light fluence. After 20 h of dark incubation in DME/1% serum, cells were stained with Ho/PI and examined by fluorescence microscopy. Plotted apoptosis levels are means ± SD of values from three replicate experiments.
